# Supplementary material for: Longitudinal Analysis of Corneal Biomechanics of Suspect Keratoconus: A Prospective Case-Control Study
Source: MDPI journal article supplement (doi:10.3390/bioengineering11050420), 2024-04-25
Supplement: s1 [file s1]

**Supplemental Table S1.** Corneal biomechanical parameters provided by the Corvis ST

| Parameters               | Definitions                                                                      |
|--------------------------|----------------------------------------------------------------------------------|
| A1 and A2 Time           | Time to reach the first and second applanation                                   |
| HC Time                  | Time to reach the highest concavity                                              |
| A1 and A2 Velocity       | Velocity at the first and second applanation                                     |
| DA Ratio Max (1 mm/2 mm) | Corneal deformation ratio between corneal apex and corneal apex within 1 mm/2 mm |
| Radius                   | Radius of curvature at corneal apex at maximum concavity                         |
| Max Inverse Radius       | Maximum value of the radius of the reverse concave surface                       |
| Integrated radius        | Calculus of the radius of the reverse concavity                                  |
| A1 and A2 dArc Length    | Arc length change from the initial state to the first and second applanation     |
| HC dArc Length           | Arc length change from the initial state to the highest concavity                |
| SP-A1                    | Stiffness parameter at first applanation                                         |
| CBI                      | Corvis biomechanical index                                                       |
| TBI                      | Tomographic biomechanical index                                                  |
| SSI                      | Stress-Strain Index                                                              |
